# Supplementary material
Source: Springer Nature journal article supplement (https://www.springermedizin.de/resource/supplementary/12960_2011_311_MOESM6_ESM.pdf/9569782)

## Rural

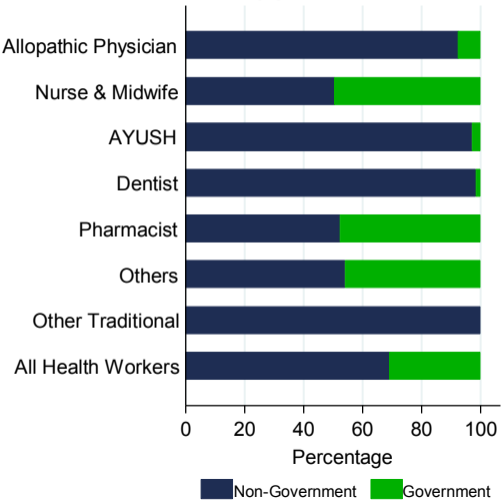

## Urban

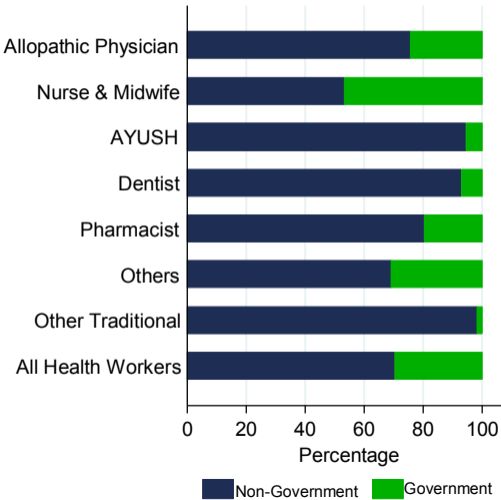

Supplement: MOESM6 [file 9569782]
